# Supplementary material for: Quantifying biases in TROPESS AIRS, CrIS, and joint AIRS+OMI tropospheric ozone products using ozonesondes
Source: Copernicus journal article supplement (doi:10.5194/egusphere-2024-3701), 2024-12-19
Supplement: Supplementary file 1 [file egusphere-2024-3701-supplement.pdf]

1 Quantifying biases in TROPES AIRS, CrIS, and joint AIRS+OMI tropospheric ozone products  
2 using ozonesondes  
3

4 Elyse A. Pennington<sup>1</sup>, Gregory B. Osterman<sup>1</sup>, Vivienne H. Payne<sup>1</sup>, Kazuyuki Miyazaki<sup>1</sup>, Kevin W.  
5 Bowman<sup>1</sup>, Jessica L. Neu<sup>1</sup>  
6

7 <sup>1</sup>Jet Propulsion Laboratory, California Institute of Technology  
8  
9

10

11 **Text:** S1

12 **Tables:** S1-S4

13 **Figures:** S1-S12

## 14 **Section S1:** Sonde Quality Control Methods

15

16 The ozonesonde data used in this study are provided by the Harmonization and Evaluation of  
17 Ground-based Instruments for Free Tropospheric Ozone Measurements (HEGIFTOM) Working  
18 Group of TOAR-II, as described in the main text in Sect. 2.2. This group used state-of-the-art  
19 techniques to reduce the uncertainty of sonde measurements across measurement sites and over  
20 time. However, the data is not fully quality controlled due to the large quantity of measured profiles  
21 and different management at each sonde launch site. Thus, users of the data products must perform  
22 their own quality control (QC), resulting in a lack of consistency in the sonde dataset used across  
23 studies. In this section, we investigate the impact that different QC methods have on the resulting  
24 sonde dataset and satellite-sonde comparisons. We use the joint AIRS+OMI and matched sonde  
25 data to test/demonstrate QC methods, and present results for all 3 satellite products (CrIS, AIRS,  
26 and joint AIRS+OMI) at the end of this section.

27

28 Quality controls can be applied to the sonde data at two points in the analysis. They can be applied  
29 to the raw sonde profiles or to the sonde profiles after the satellite operator has been applied. The  
30 joint AIRS+OMI data that has been colocated with sonde data are shown in Fig. S1b. The raw  
31 sonde profiles that have been colocated with joint AIRS+OMI data are shown in Fig. S1c and the  
32 same profiles that have had the satellite operator applied are shown in Fig. S1a. There are features in  
33 some of the raw sonde profiles that are physically unrealistic, including anomalously high ozone at  
34 low altitudes and anomalously low ozone at high altitudes. In some of the sonde profiles that have  
35 had the satellite operator applied, these anomalous features persist. The application of the satellite  
36 operator generally retains the unphysical features seen in the raw sonde profiles and can, in rarer  
37 cases, generate unphysical profiles from sonde profiles that do not have obvious quality issues.

38

39 To investigate the sources of poor quality data, we test multiple QC methods.

40 Some methods are applied to the raw sonde profiles -- Step 1 -- and other methods are applied to  
41 the sonde + operator profiles -- Step 2. The methods in both steps are described in Table S1. Some  
42 of our Step 1 methods address many of the physical impossibilities listed above by removing profiles  
43 that display erroneously high and/or low values at different pressure levels (i.e., 50\_p01, 50\_p1,  
44 600\_p3, 300\_1, max16). Some of our other Step 1 methods instead remove profiles in which the  
45 sonde stopped measuring at low altitude (i.e., minP\_70, minP\_60, minP\_50, minP\_TP), so they do  
46 not provide sufficient information in the stratosphere. Lastly, some Step 1 methods compare the  
47 sonde profiles to the distribution of satellite profiles and remove any sonde profiles that fall outside  
48 different ranges of the variance in the satellite profiles (i.e., 3\_sigma, 4\_sigma, 5\_sigma). After  
49 applying the satellite operator, the noise in the data has been smoothed and/or removed, so the QC  
50 techniques used here are slightly different. Simple statistics can again be used to filter out profiles  
51 that fall far from the bulk of the satellite profiles (i.e., 3\_sigma\_op, 4\_sigma\_op, 5\_sigma\_op). To  
52 reduce the circularity of our approach, we also tried utilizing an independent climatology of ozone in  
53 the stratosphere from the Aura Microwave Limb Sounder to filter out profiles with unrealistic  
54 stratospheric concentrations (MLS4sigma, MLS5sigma, MLS6sigma, MLS7sigma, MLSminmax,  
55 MLS199, MLS01999). Because MLS only measures in the stratosphere, we compare the sonde  
56 profiles in the troposphere to the distribution of satellite profiles in the troposphere and remove any  
57 sonde profiles that fall outside different ranges of the variance in the satellite profiles (trop3sigma,  
58 trop4sigma, trop5sigma). This method is similar to some of the methods used in Step 1, but now are  
59 only applied in the troposphere to supplement the MLS data in the stratosphere. For all Step 1-2  
60 methods, we remove an entire profile if it contains any data that does not pass the quality check. If  
61 an alternative method is used which removes the single data point failing the quality check -- but

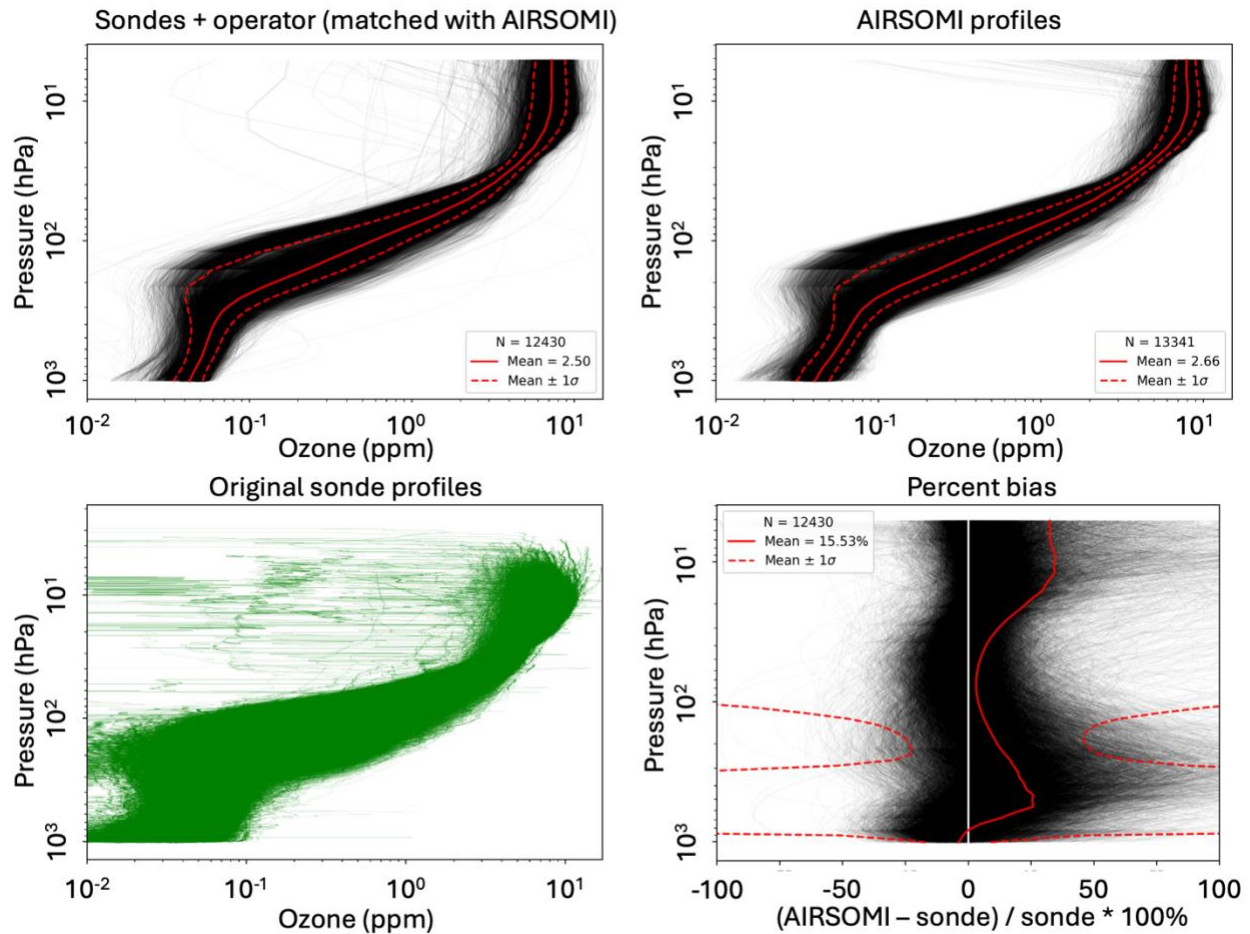

62  
 63 Figure S1: All ozone profiles used in the joint AIRS+OMI-sonde comparison, with no QC applied.  
 64 (a) Sonde profiles with satellite operators applied. (b) Joint AIRS+OMI profiles. (c) Sonde profiles  
 65 without satellite operators applied. (d) Percent difference between profiles in (a) and (b). The solid  
 66 red line displays the mean difference profile and the dashed red lines display one standard deviation  
 67 outside of the mean.

68  
 69 saves the remainder of the profile – the results are minimally changed relative to removing the whole  
 70 profile, suggesting that poor-quality profiles have many erroneous data points that impact the entire  
 71 profile and not only a small portion of the profile.

72  
 73 Three metrics are used to determine the impact of each QC method: the percentage of profiles  
 74 removed, the median satellite-sonde percent bias between matched profiles, and the trend of  
 75 satellite-sonde percent bias between matched profiles (Table S2). Ideally, the percentage of profiles  
 76 removed should not be so large that good-quality profiles are removed and create an  
 77 unrepresentative sample. There are no benchmark, "goal" values to obtain for the bias or bias trend,  
 78 but the variation in these values between metrics can provide information about the relative impact  
 79 of each QC method compared to other QC methods. Additionally, the filtered satellite-sonde bias  
 80 profiles along with profiles of their mean and standard deviation can provide information about the  
 81 spread of sonde profiles. Without quality controls, the standard deviation in the satellite-sonde  
 82 percent bias is very large (Fig. S1d) and impacted by outliers.

83

84 Table S1: The quality control methods tested on the original sonde data (left 2 columns) and the  
 85 sonde data with the satellite operator applied (right 2 columns). The 1st and 3rd columns list the  
 86 labels used in testing and the 2nd and 4th columns describe those methods.

| QC Step 1 Label | Description                                                                                    | QC Step 2 Label | Description                                                                                                       |
|-----------------|------------------------------------------------------------------------------------------------|-----------------|-------------------------------------------------------------------------------------------------------------------|
| none            | No QC applied                                                                                  | none_op         | No QC applied                                                                                                     |
| 50_p01          | Removed if VMR(<50 hPa) < 0.01 ppm                                                             | 3_sigma_op      | Removed if the percent bias btwn sonde and sat was > 3 std. dev. outside the mean bias profile                    |
| 50_p1           | Removed if VMR(<50 hPa) < 0.1 ppm                                                              | 4_sigma_op      | Same as above but 4 std. dev.                                                                                     |
| 600_p3          | Removed if VMR(>600 hPa) > 0.3 ppm                                                             | 5_sigma_op      | Same as above but 5 std. dev.                                                                                     |
| 300_1           | Removed if VMR(>300 hPa) > 1 ppm                                                               | MLS4sigma       | Removed if value in profile was outside MLS mean +/- 4 std. dev.                                                  |
| max16           | Removed if any concentration > 16 ppm                                                          | MLS5sigma       | Same as above but 5 std. dev.                                                                                     |
| minP_70         | Removed if measurements stop below reaching 70 hPa                                             | MLS6sigma       | Same as above but 6 std. dev.                                                                                     |
| minP_60         | Same as above but 60 hPa                                                                       | MLS7sigma       | Same as above but 7 std. dev.                                                                                     |
| minP_50         | Same as above but 50 hPa                                                                       | MLSminmax       | Removed if value in profile was outside MLS min/max                                                               |
| minP_TP         | Removed if measurements stop below reaching the tropopause                                     | MLS199          | Removed if value in profile was outside MLS 1st / 99th percentile                                                 |
| 3_sigma         | Removed if the percent bias btwn sonde and sat was > 3 std. dev. outside the mean bias profile | MLS01999        | Removed if value in profile was outside MLS 0.1 / 99.9th percentile                                               |
| 4_sigma         | Same as above but 4 std. dev.                                                                  | trop3sigma      | Removed if the percent bias btwn sonde and sat was > 3 std. dev. outside the mean bias profile in the troposphere |
| 5_sigma         | Same as above but 5 std. dev.                                                                  | trop4sigma      | Same as above but 4 std. dev.                                                                                     |
|                 |                                                                                                | trop5sigma      | Same as above but 5 std. dev.                                                                                     |

87  
 88 Many of the Step 1 methods do not sufficiently QC the sonde data, necessitating the use of Step 2  
 89 filters. The Step 1 methods that filter the sonde profiles using strict concentration and pressure  
 90 cutoffs (i.e., 50\_p01, 50\_p1, 600\_p3, 300\_1, max16, minP\_70, minP\_60, minP\_50, minP\_TP) do  
 91 not substantially impact the standard deviation of the satellite-sonde bias profiles (Fig. S2A-I) or the  
 92 tropospheric column percent bias (Table S2), making them insufficient to completely filter the sonde  
 93 data. The Step 1 methods that filter sonde profiles via comparison to the satellite data (i.e., 3\_sigma,  
 94 4\_sigma, 5\_sigma) have an improved impact on the bias profile standard deviations (Fig. S2J-L), but  
 95 4\_sigma and 5\_sigma leave large standard deviations in the troposphere and 3\_sigma

96 Table S2: Metrics describing the outcome of using each QC method on the matched joint  
 97 AIRS+OMI-sonde data as described in Table S1.

| <b>QC method</b> | <b>No. of matched profiles</b> | <b>No. of profiles removed</b> | <b>Percent profiles removed (%)</b> | <b>Trop. column percent bias (%)</b> | <b>Trop. column percent bias trend (%/decade)</b> |
|------------------|--------------------------------|--------------------------------|-------------------------------------|--------------------------------------|---------------------------------------------------|
| none, none_op    | 12430                          | 0                              | 0                                   | 6.6                                  | 0.11                                              |
| 50_p01           | 12425                          | 5                              | 0.04                                | 6.6                                  | 0.11                                              |
| 50_p1            | 12407                          | 23                             | 0.19                                | 6.58                                 | 0.09                                              |
| 600_p3           | 12428                          | 2                              | 0.02                                | 6.6                                  | 0.12                                              |
| 300_1            | 12428                          | 2                              | 0.02                                | 6.6                                  | 0.12                                              |
| max16            | 12428                          | 2                              | 0.02                                | 6.6                                  | 0.12                                              |
| minP_70          | 12131                          | 299                            | 2.41                                | 6.57                                 | 0.04                                              |
| minP_60          | 12090                          | 340                            | 2.74                                | 6.57                                 | 0.02                                              |
| minP_50          | 12038                          | 392                            | 3.15                                | 6.57                                 | 0.02                                              |
| minP_TP          | 12322                          | 108                            | 0.87                                | 6.59                                 | 0.12                                              |
| 3_sigma          | 10348                          | 2082                           | 16.7                                | 7.69                                 | -0.06                                             |
| 4_sigma          | 11681                          | 749                            | 6.03                                | 7.18                                 | 0.1                                               |
| 5_sigma          | 12086                          | 344                            | 2.77                                | 6.92                                 | 0.04                                              |
| 3_sigma_op       | 12257                          | 173                            | 1.39                                | 6.46                                 | 0.21                                              |
| 4_sigma_op       | 12354                          | 76                             | 0.61                                | 6.54                                 | 0.12                                              |
| 5_sigma_op       | 12385                          | 45                             | 0.36                                | 6.56                                 | 0.1                                               |
| MLS4sigma        | 10963                          | 1467                           | 11.8                                | 6.44                                 | -0.05                                             |
| MLS5sigma        | 11731                          | 699                            | 5.62                                | 6.6                                  | 0.12                                              |
| MLS6sigma        | 12033                          | 397                            | 3.19                                | 6.57                                 | 0.15                                              |
| MLS7sigma        | 12181                          | 249                            | 2                                   | 6.58                                 | 0.1                                               |
| MLSminmax        | 10365                          | 2065                           | 16.6                                | 6.47                                 | -0.24                                             |
| MLS199           | -                              | -                              | > 30                                | -                                    | -                                                 |
| MLS01999         | -                              | -                              | > 30                                | -                                    | -                                                 |
| trop3sigma       | 12324                          | 106                            | 0.85                                | 6.49                                 | 0.18                                              |
| trop4sigma       | 12392                          | 38                             | 0.31                                | 6.56                                 | 0.14                                              |
| trop5sigma       | 12414                          | 16                             | 0.13                                | 6.57                                 | 0.13                                              |

98  
 99 removes too many profiles (Table S2). The Step 2 filters tend to have a larger impact on satellite-  
 100 sonde bias. The Step 2 methods that compare the smoothed sonde profiles to the spread in the  
 101 satellite profiles (i.e., 3\_sigma\_op, 4\_sigma\_op, 5\_sigma\_op) have a noticeable impact on the spread  
 102 of bias in the stratosphere (Fig. S2M-O) as well as the trend in bias (Table S2). We choose to focus  
 103 on the methods that use MLS climatology so that we compare to an independent dataset.

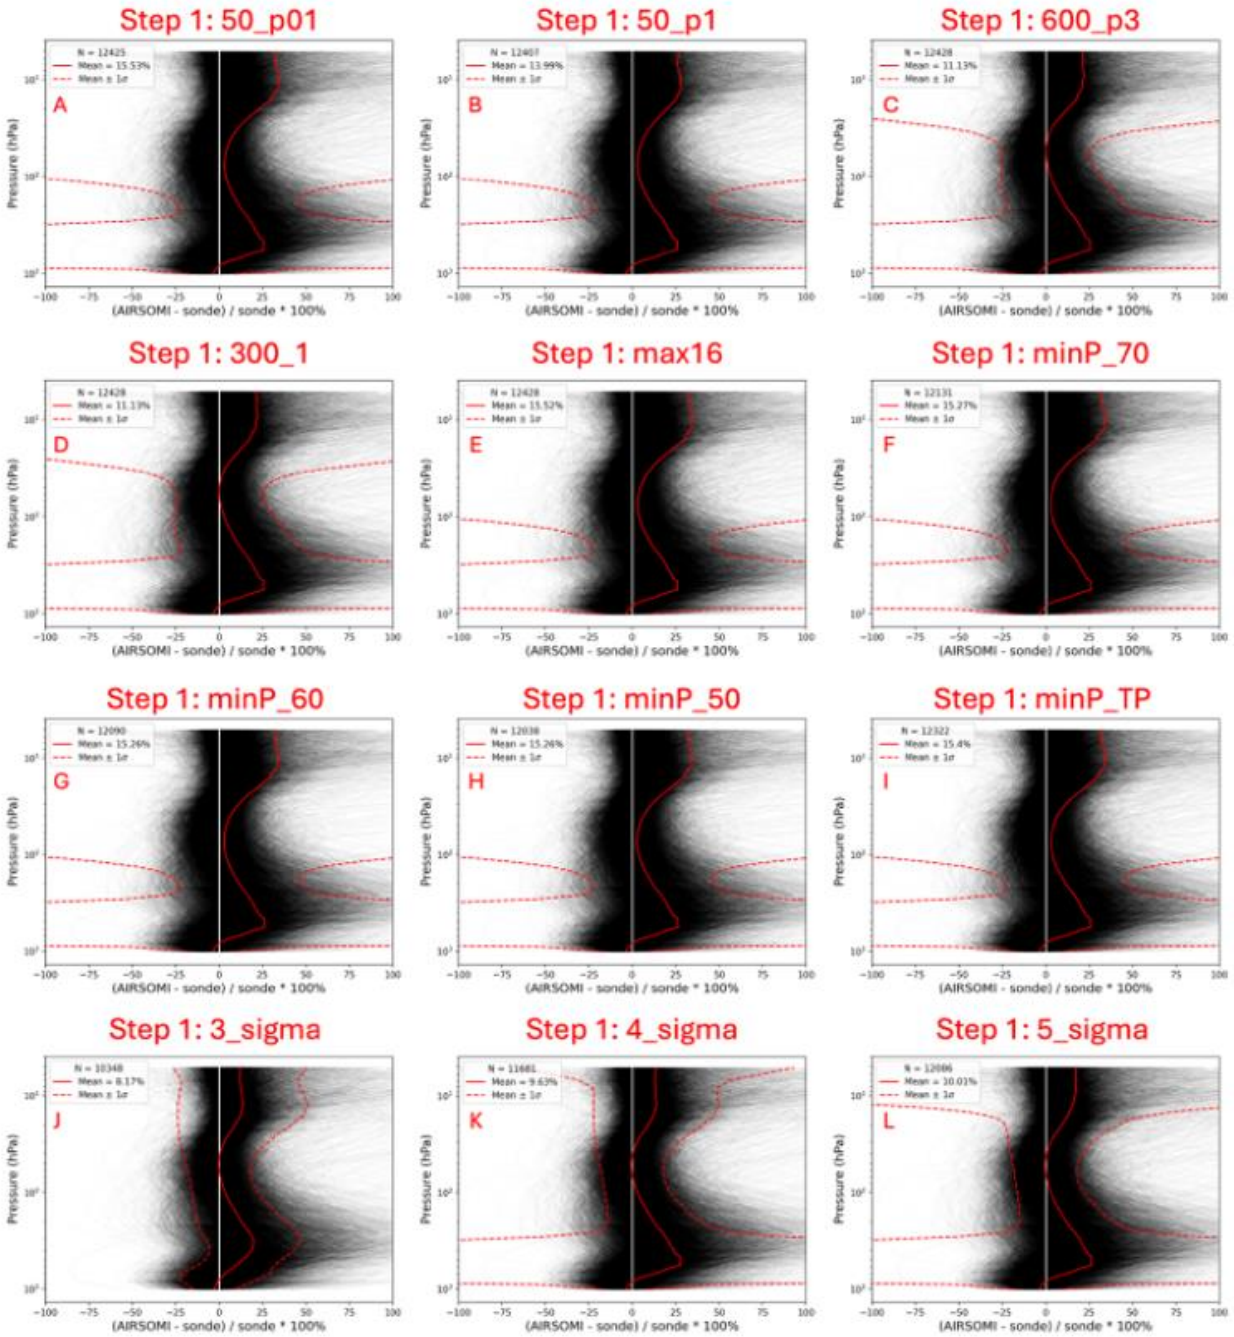

104  
105  
106

Figure S2: Same as Fig. S1d using different QC methods described in Table S1.

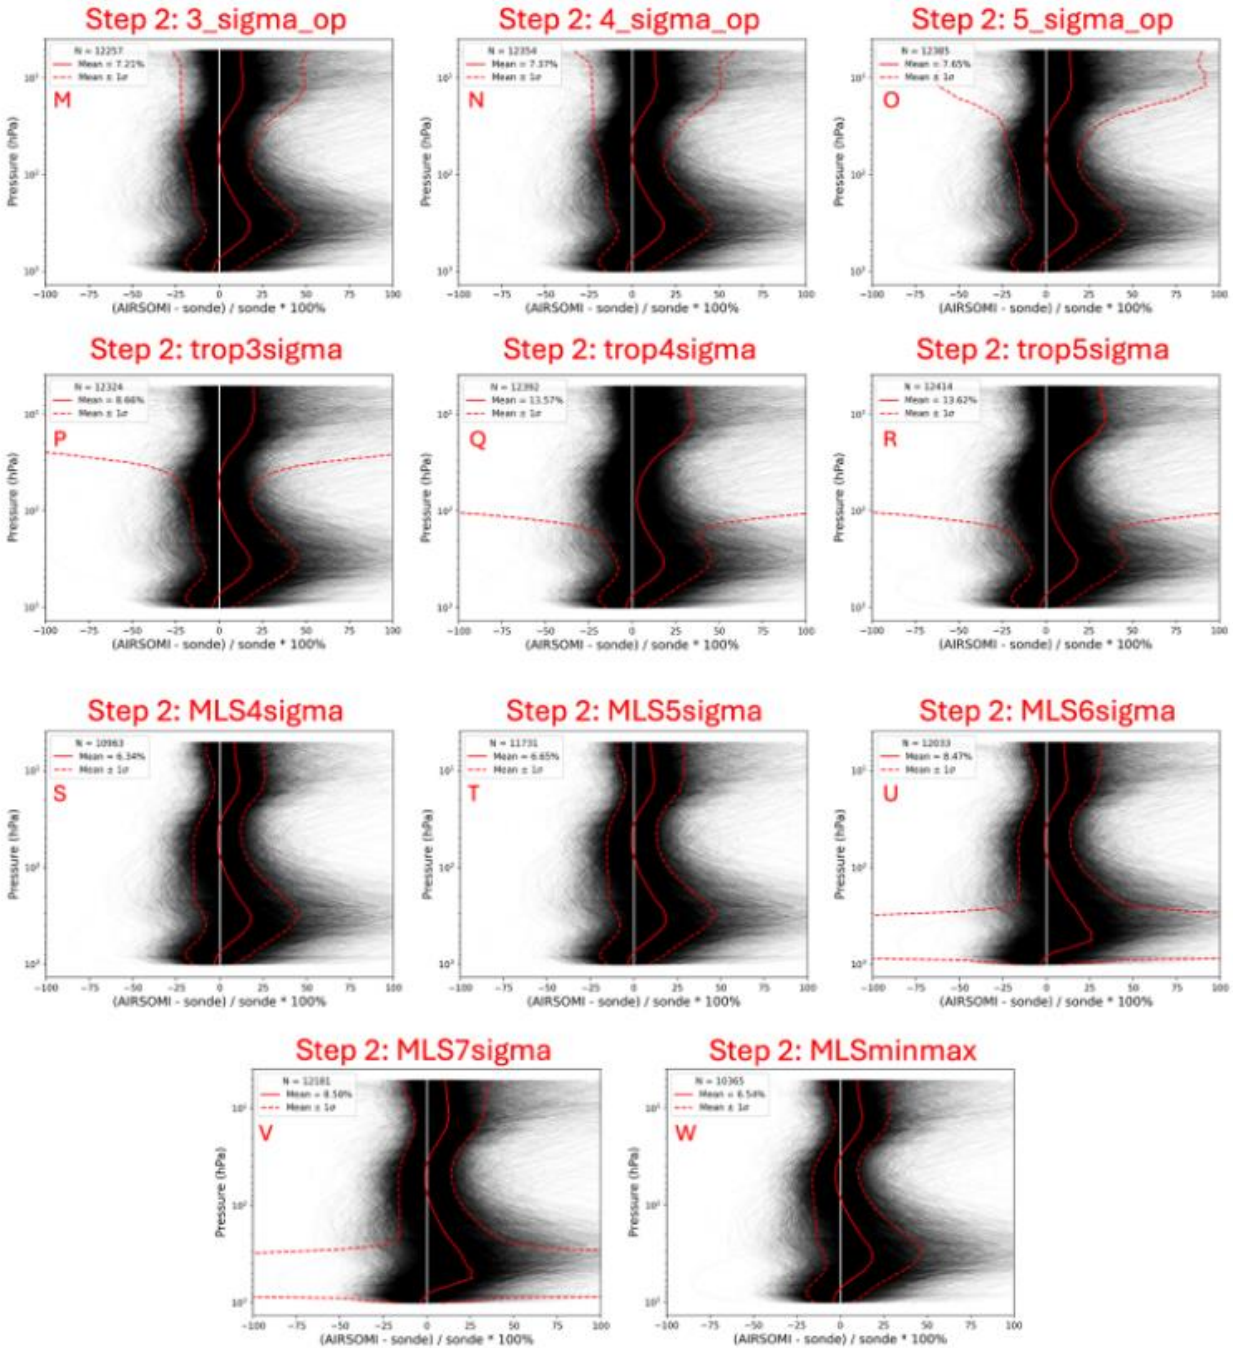

107  
108 Figure S2, cont.  
109

110 MLSminmax, MLS199, and MLS01999 led to the removal of too many profiles (Table S2), while  
111 MLS6sigma and MLS7sigma distorted the shape of the mean bias profile (Fig. S2U-V). Despite  
112 similar mean and standard deviation profiles for MLS4sigma and MLS5sigma (Fig. S2S-T),  
113 MLS4sigma removed many more profiles and altered the tropospheric column bias and bias trend  
114 (Table S2). Therefore, MLS5sigma is the most reliable method for filtering sondes in the  
115 stratosphere. Given the lack of an independent tropospheric ozone climatology, we focus on QC  
116 methods that use the spread of the tropospheric profiles from each satellite product to constrain the  
117 smoothed sonde profiles in the troposphere. While filtering the troposphere may not be strictly

118 necessary given the good performance of the MLS5sigma method to filter full atmospheric profiles,  
 119 the examples given here are for joint AIRS+OMI which has the lowest retrieval throughput. Given  
 120 tests with our other satellite products, and to create a method that can be extended to datasets that  
 121 do not extend into the stratosphere, we investigate the trop3sigma, trop4sigma, and trop5sigma  
 122 methods. Their impact on the standard deviation profiles in Fig. S2P-R appears consistent, but their  
 123 impact on the quantities in Table S2 is varied. The trop5sigma method is selected given the low  
 124 percentage of profiles removed and its low bias trend.  
 125

126 Finally, we test the combination of methods across and within Steps 1 and 2. Because many of the  
 127 Step 1 methods did not have large impacts on resulting satellite-sonde metrics, we apply some of  
 128 them together to test their combined efficacy (i.e., 50\_p1, 600\_p3, 300\_1, max16). We also test two  
 129 of the Step 2 methods together to cover both the stratosphere and troposphere (i.e., MLS5sigma,  
 130 trop5sigma). Third, we test some of the Step 1 and Step 2 methods together (i.e., 50\_p1, 600\_p3,  
 131 300\_1, max16, MLS5sigma, trop5sigma). These three scenarios listed in Table S3. The Step 1  
 132 methods (i.e., 50\_p1, 600\_p3, 300\_1, max16) removed few profiles and had minimal improvement  
 133 on the standard deviation of the bias (Fig. S3a). In contrast, the combination of the two Step 2  
 134 methods (i.e., MLS5sigma, trop5sigma) improved the standard deviation profiles by removing  
 135 outliers that made up 5.7% of all profiles (Fig. S3b). Combining the Step 1 and Step 2 methods (i.e.,  
 136 50\_p1, 600\_p3, 300\_1, max16, MLS5sigma, trop5sigma) had little impact on the percentage of  
 137 profiles removed, standard deviation of the bias, tropospheric column bias, or trend in the bias (Fig.  
 138 S3c, Table S3). The fact that the number of profiles removed by the combined Step 1+2 test is  
 139 lower than the sum of the Step 1 or Step 2 methods alone means that the Step 2 removal process  
 140 removes the profiles of some poor-quality raw profiles that would have been flagged in the Step 1  
 141 filtering process.  
 142

143 Given the above results, we chose to move forward with the MLS5sigma\_trop5sigma sonde QC  
 144 method. While this method does not QC the original sonde data directly, it constrains the sondes to  
 145 physically realistic values through the use of MLS climatology data in the stratosphere and the  
 146 distributions of each TROPES dataset in the troposphere. Using this method of QC, the  
 147 percentage of profiles removed from CrIS, AIRS, and joint AIRS+OMI comparisons are 4.5%,  
 148 3.5%, and 5.7%, respectively.  
 149  
 150

151 Table S3: Same as Table S2, but for combined QC methods.

| <b>QC method</b>                                   | <b>No. of matched profiles</b> | <b>No. of profiles removed</b> | <b>Percent profiles removed (%)</b> | <b>Trop. column percent bias (%)</b> | <b>Trop. column percent bias trend (%/decade)</b> |
|----------------------------------------------------|--------------------------------|--------------------------------|-------------------------------------|--------------------------------------|---------------------------------------------------|
| 50_p1, 600_p3, 300_1, max16                        | 12403                          | 27                             | 0.22                                | 6.58                                 | 0.1                                               |
| MLS5sigma, trop5sigma                              | 11722                          | 708                            | 5.7                                 | 6.59                                 | 0.12                                              |
| 50_p1, 600_p3, 300_1, max16, MLS5sigma, trop5sigma | 11715                          | 715                            | 5.75                                | 6.59                                 | 0.12                                              |

152  
 153  
 154



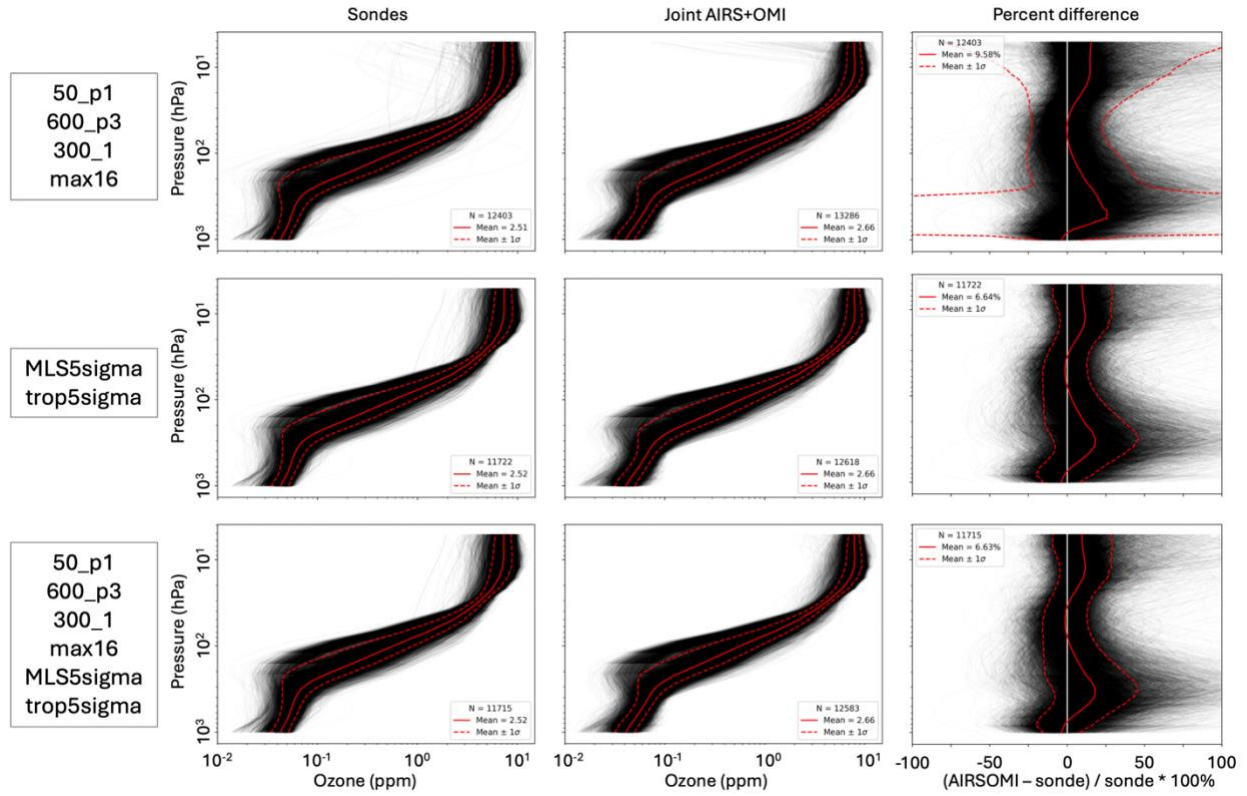

155  
 156  
 157  
 158  
 159

Figure S3: Ozone profiles and percent difference profiles using three QC methods (boxed on the left-hand side). First column: Sonde profiles with satellite priors applied. Middle column: Joint AIRS+OMI profiles. Right column: Percent difference profiles.

160 Table S4: The p values corresponding to the trends calculated from the monthly-averaged percent  
 161 bias in Fig. 5.  
 162

| Latitude Band | CrIS  | AIRS  | Joint<br>AIRS+OMI |
|---------------|-------|-------|-------------------|
| 60° → 90°     | 0.295 | 0.002 | 0.529             |
| 30° → 60°     | 0.864 | 0.091 | 0.435             |
| 0° → 30°      | 0.405 | 0.955 | 0.479             |
| -15° → 15°    | 0.054 | 0.006 | 0.028             |
| -30° → 0°     | 0.333 | 0.161 | 0.09              |
| -60° → -30°   | 0.957 | 0.491 | 0.431             |

163  
 164  
 165  
 166  
 167

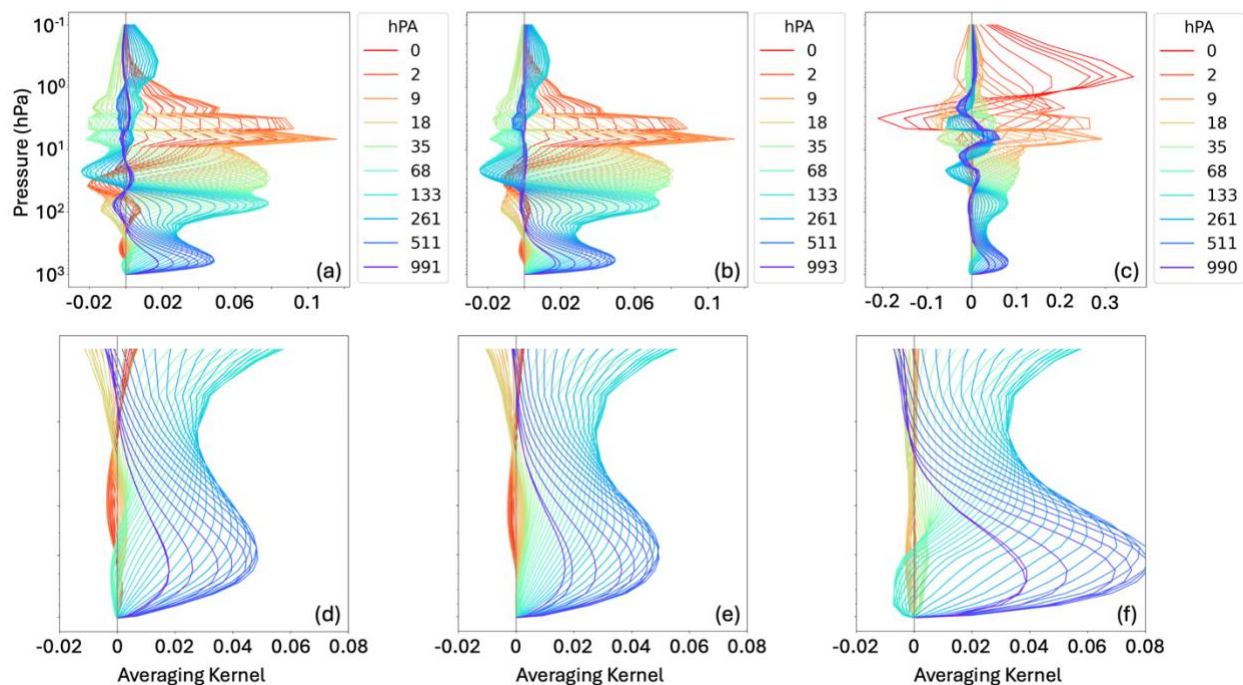

168  
 169 Figure S4: Representative averaging kernels for CrIS (left), AIRS (middle), and joint AIRS+OMI  
 170 (right) averaged over satellite retrievals that were matched with sonde observations in SON  
 171 (September/October/November) over Irene, South Africa. Top: Complete atmospheric profile.  
 172 Bottom: Troposphere only.  
 173

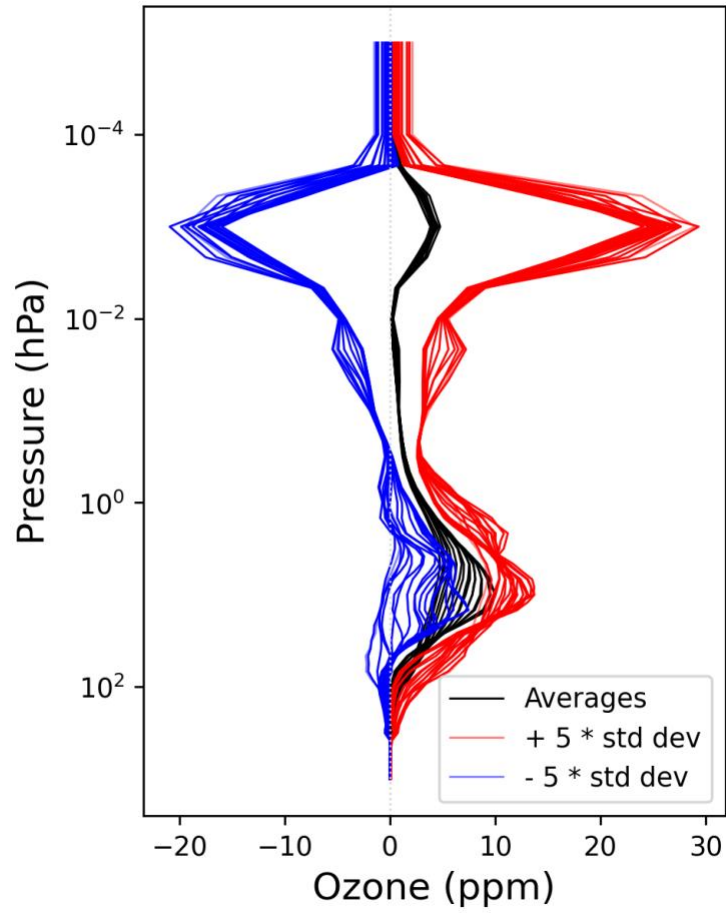

174  
175  
176  
177  
178  
179  
180  
181

Figure S5: MLS climatology derived from data in Werner et al. (2023). The averages (black)  $\pm 5$  \* standard deviation (red and blue) are plotted for each latitude band spaced evenly every  $10^\circ$ .

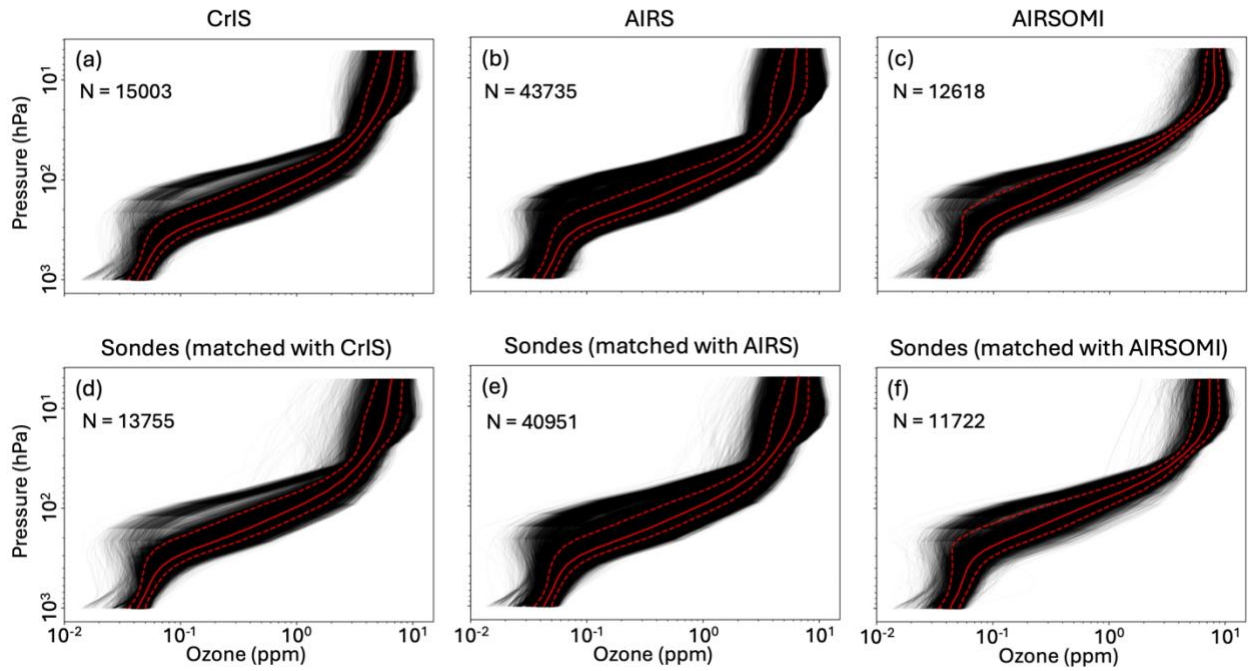

182  
 183  
 184  
 185  
 186  
 187  
 188

Figure S6: Satellite (top) and sonde (with satellite operators applied; bottom) for coincident measurements of CrIS (left), AIRS (middle), and joint AIRS+OMI (right) at all locations over the entirety of the data period for each product.

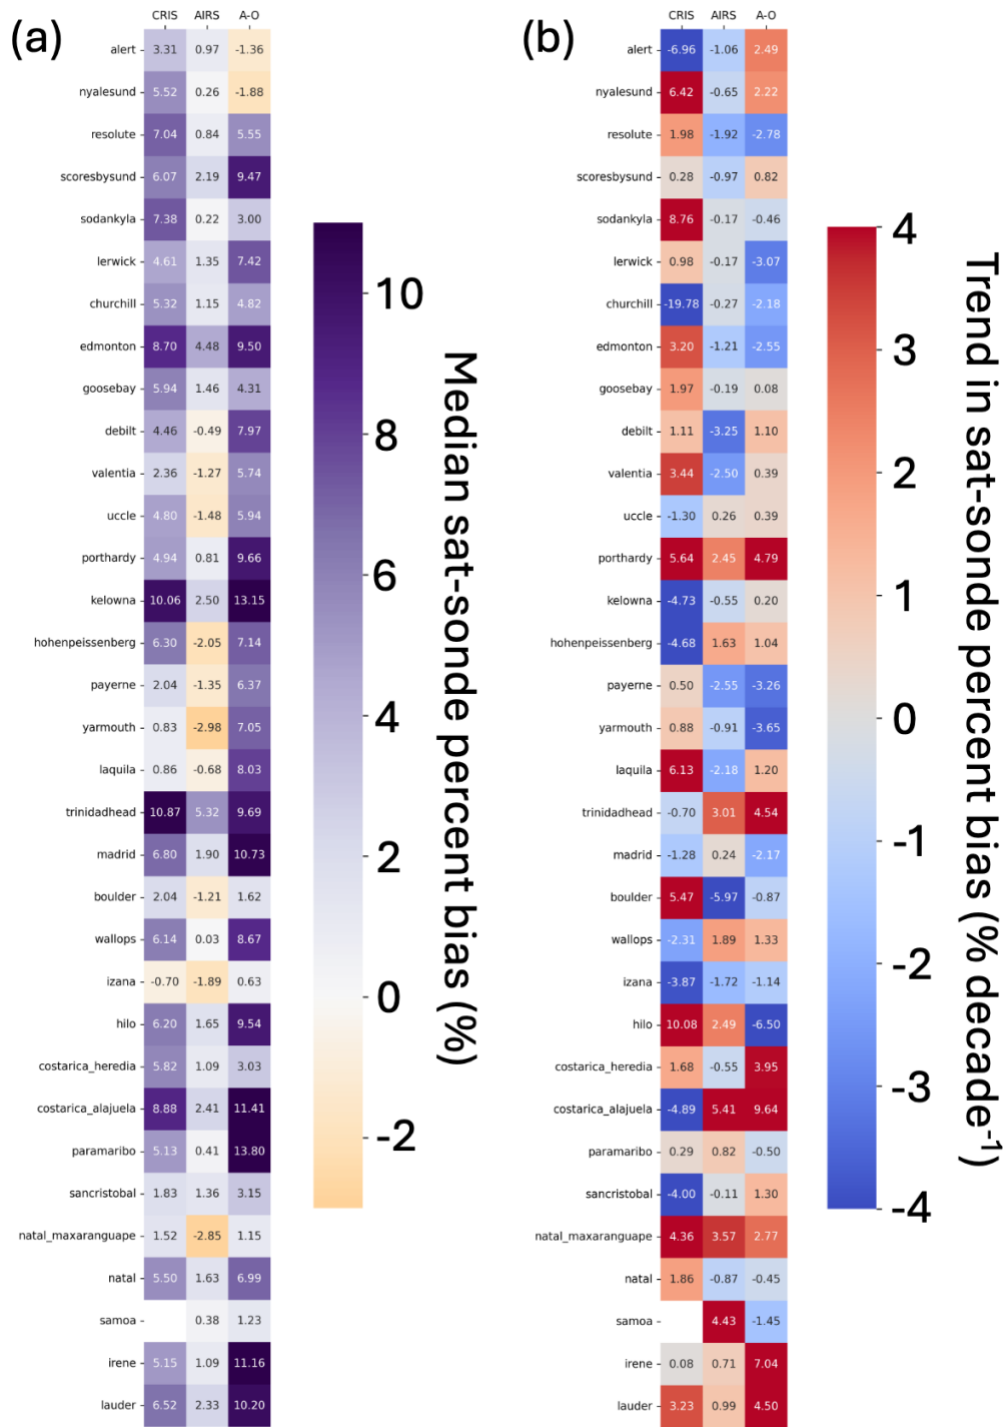

189  
 190  
 191  
 192  
 193  
 194  
 195  
 196  
 197

Figure S7: Left: Median satellite-sonde percent bias averaged over the complete time period for each satellite product at each sonde launch site. Right: Trend in satellite-sonde percent bias calculated over the complete time period for each satellite product at each sonde launch site.

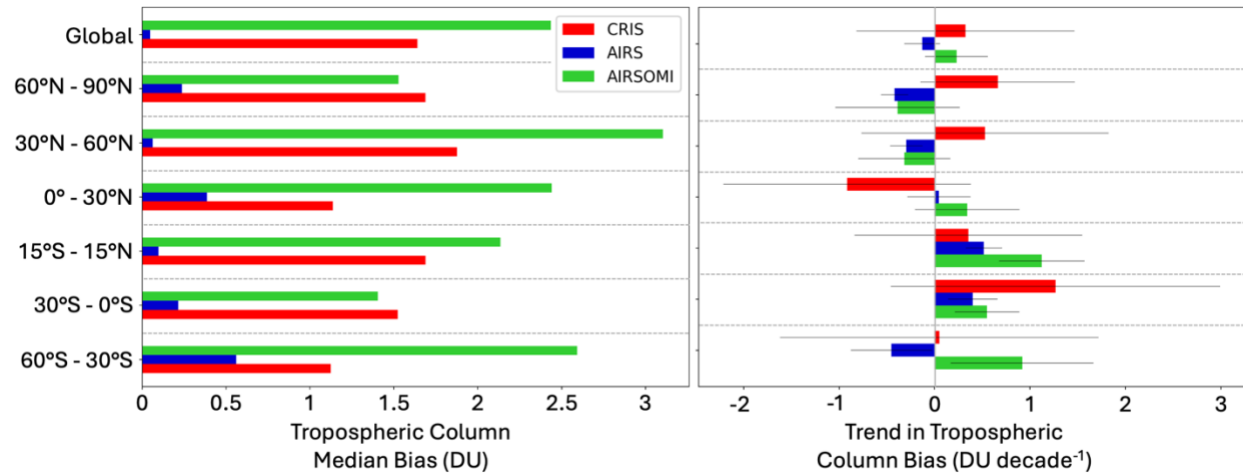

198  
 199  
 200  
 201  
 202

Figure S8: Left: The median tropospheric column absolute bias averaged over sites in each latitude band. Bottom right: The trend in tropospheric column absolute bias in each latitude band.

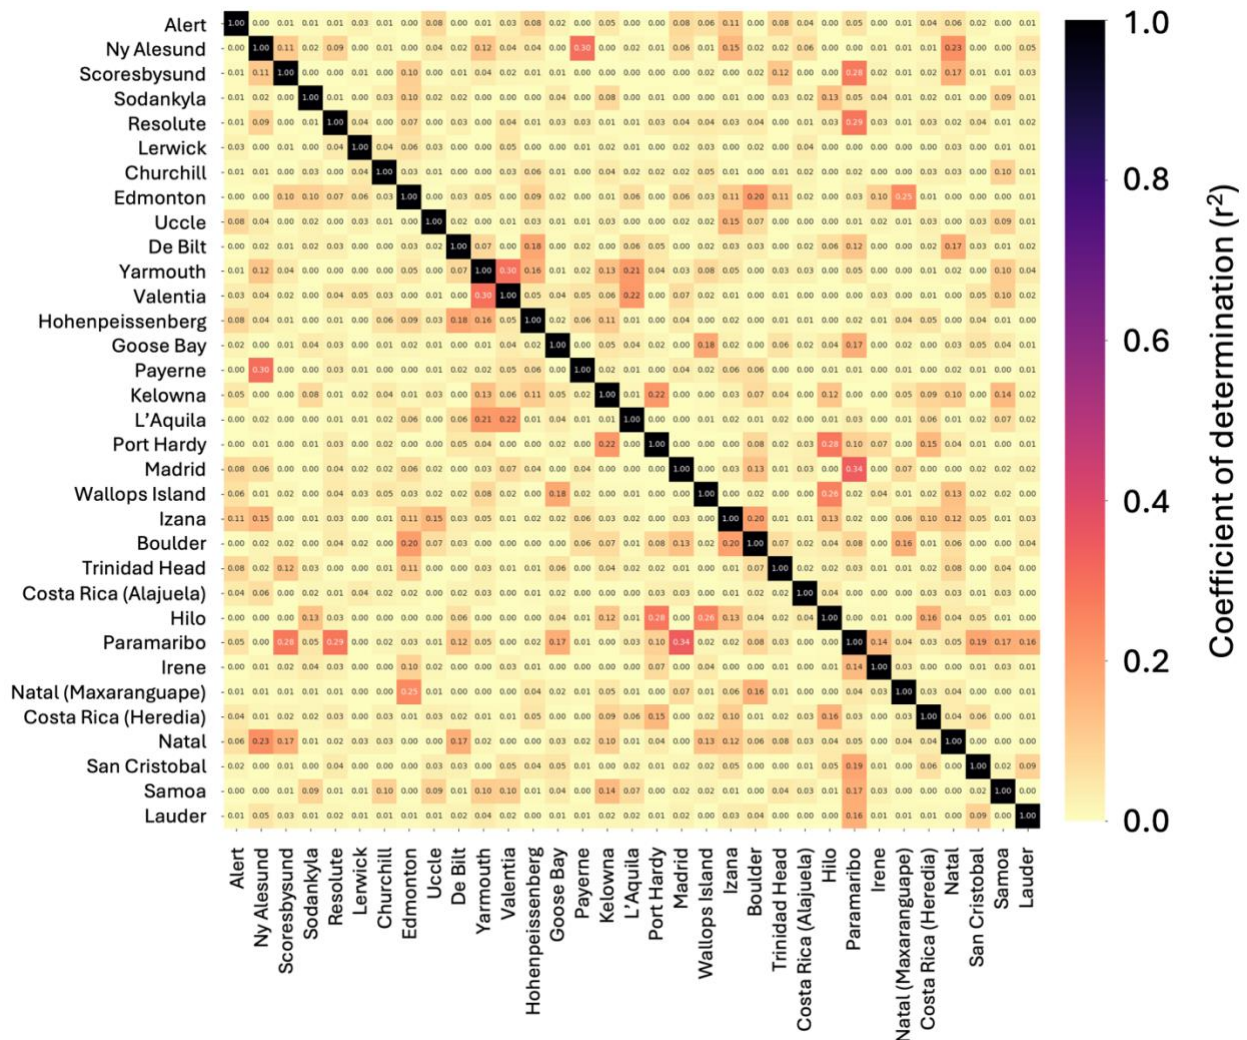

Figure S9: Coefficient of determination ( $r^2$ ) between the monthly-averaged time series of tropospheric column percent bias at each sonde launch site.

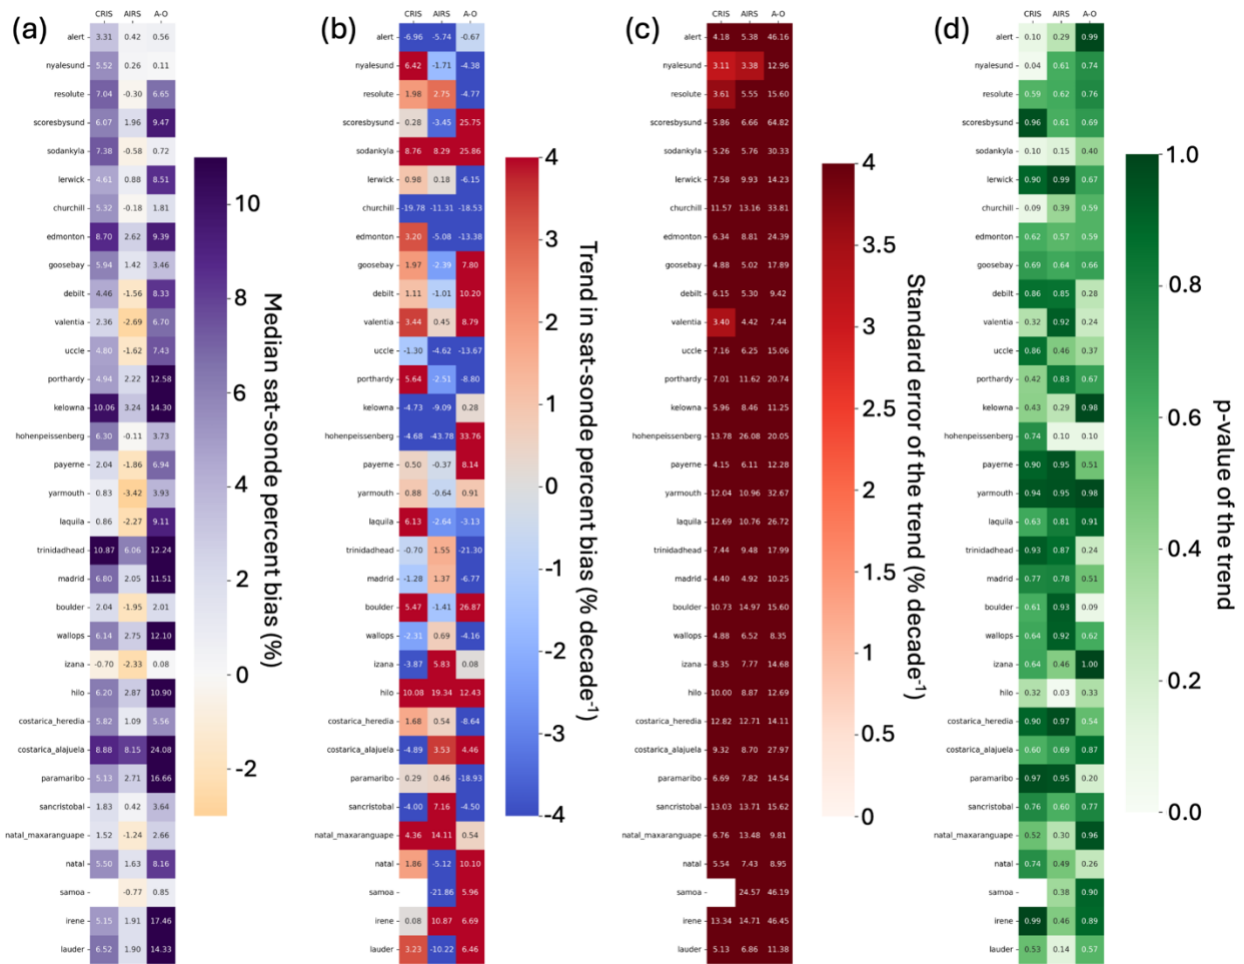

208  
 209  
 210  
 211  
 212  
 213  
 214  
 215  
 216  
 217  
 218  
 219  
 220  
 221

Figure S10: First column: Median satellite-sonde percent bias averaged over the CrIS time period for each satellite product at each sonde launch site. Second column: Trend in satellite-sonde percent bias calculated over the CrIS time period for each satellite product at each sonde launch site. Third column: standard errors associated with the reported trends in the second column. Fourth column: p values associated with the reported trends in the second column.



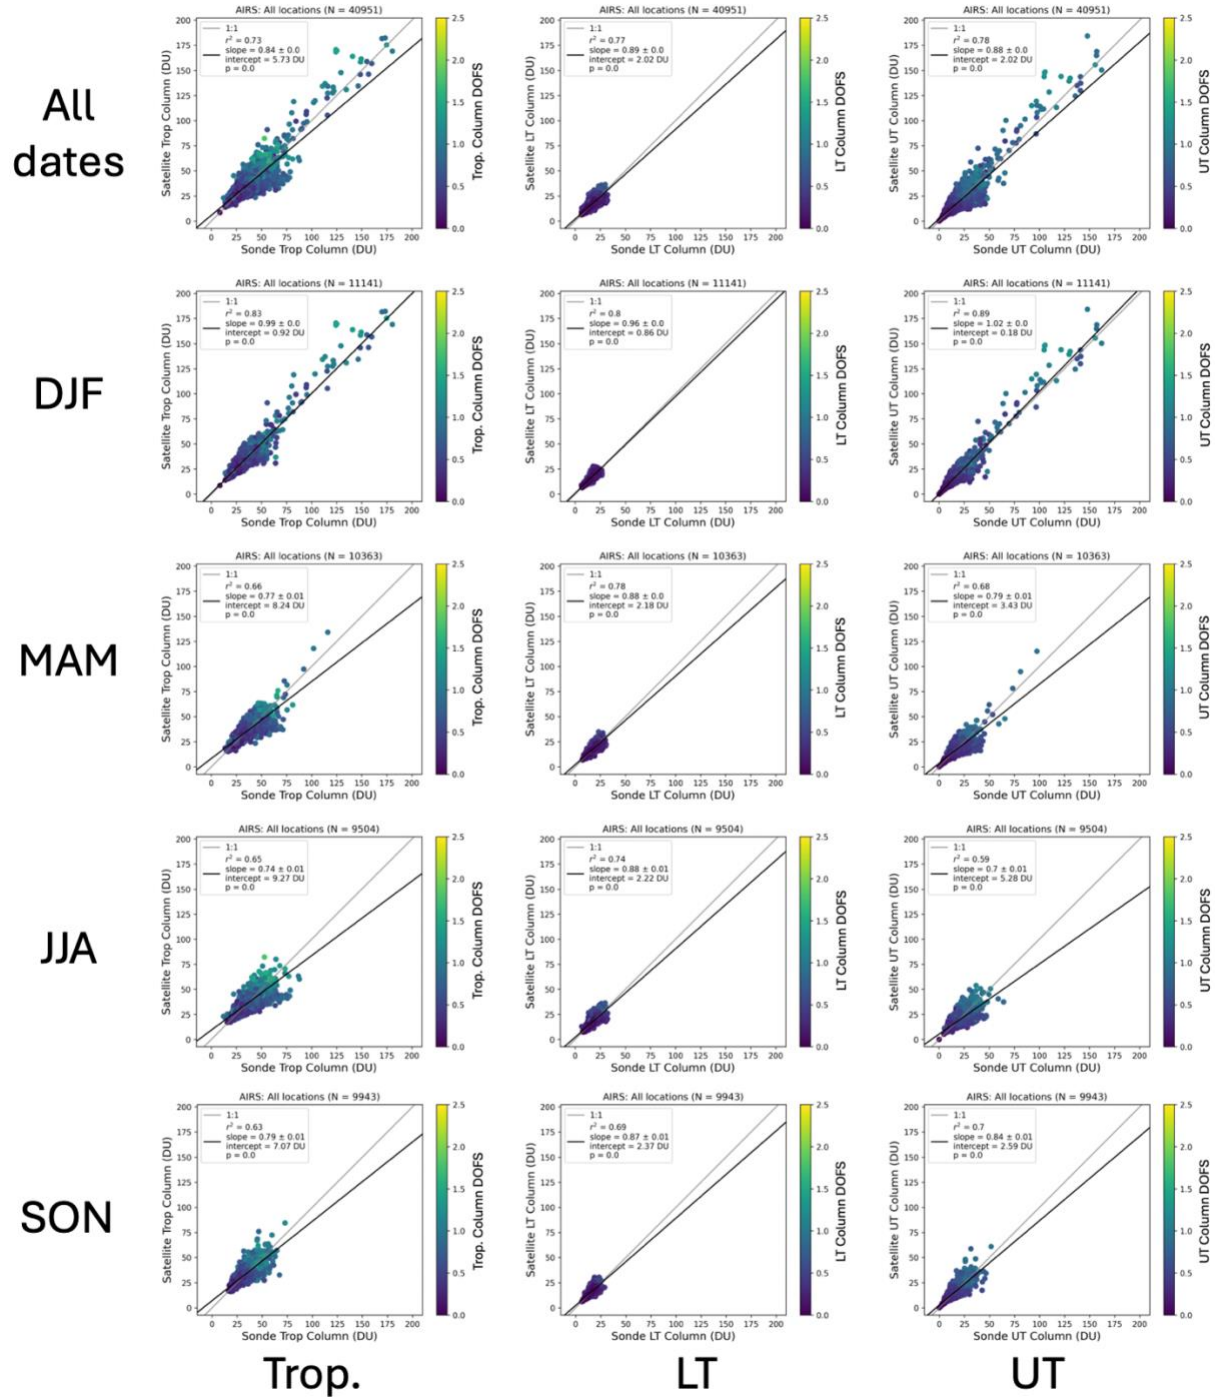

222  
 223 Figure S11: AIRS versus sonde tropospheric (left), LT (middle), and UT (right) ozone columns for  
 224 all dates (top), December/January/February (second row), March/April/May (third row),  
 225 June/July/August (fourth row), and September/October/November (bottom row) colored by the  
 226 degrees of freedom for signal (DOFS) in each subcolumn. The gray line is the 1:1 line and the black  
 227 line is a simple linear regression fit.

228  
 229  
 230

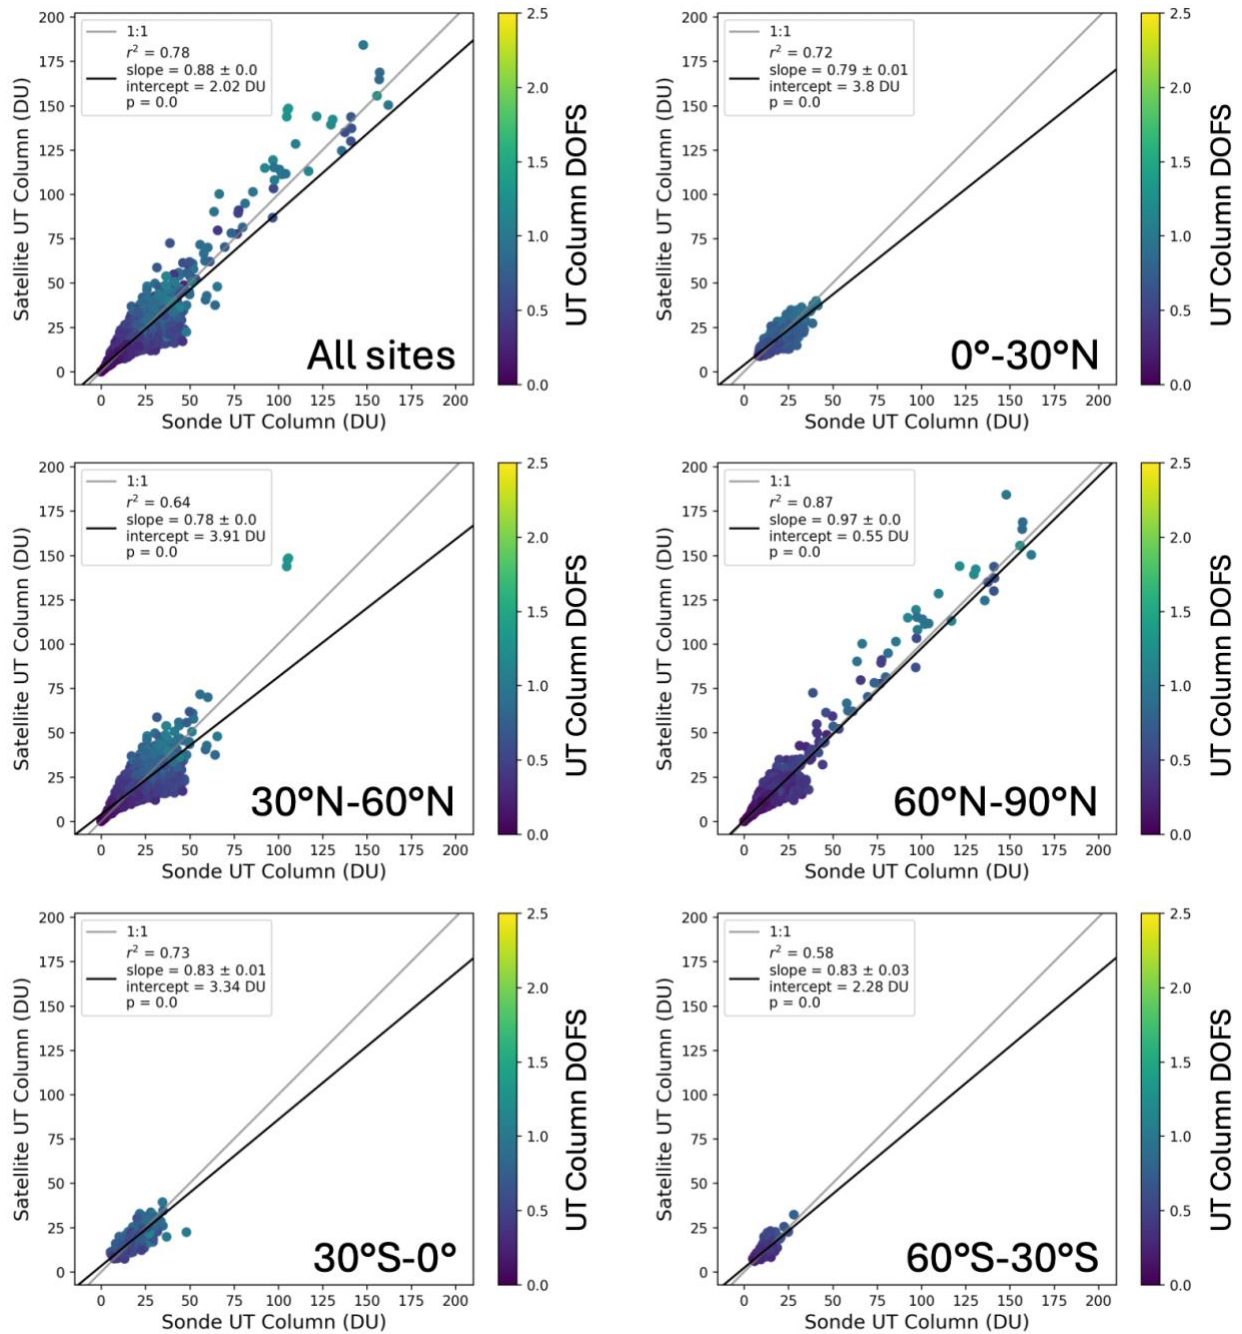

231  
232

233 Figure S12: AIRS versus sonde UT ozone columns for all dates globally (top left) and all other  
234 latitude bands (other subpanels) colored by the degrees of freedom for signal (DOFS) in each  
235 subcolumn. The gray line is the 1:1 line and the black line is a simple linear regression fit.
